# Supplementary material for: Paenibacillus Sinensis sp. nov., a Nitrogen-fixing Species Isolated from Plant Rhizospheres
Source: Research Square preprint supplement (doi:10.21203/rs.3.rs-867873/v1), 2021-09-17
Supplement: Supplementary file 1 [file f056b477a223057224f75b3e.docx]

Table S1 Fatty acid content (%) of strain HN-1T and 39 and some other type strains of the *Paenibacillus* genus.

| Fatty acid | HN-1T | DSM 14472T | DSM 17841T |
| --- | --- | --- | --- |
| Saturated straight-chain | | | |
| C14:0 | 5.14 | 9 | 2.93 |
| C16:0 | 14.18 | 40.6 | 18.07 |
| Branched fatty acid | | | |
| Iso-C14:0 | 6.58 | 3.1 | 3.24 |
| Anteiso-C15:0 | 41.14 | 25.2 | 36.62 |
| Iso-C15:0 | 12.19 | 10.4 | 1.4 |
| Iso-C16:0 | 6.96 | 5.6 | 14.44 |
| Anteiso-C17:0 | 1.59 | 1.5 | 6.34 |
| Iso-C17:0 | 1.52 | 2.4 | 0.82 |
| Unsaturated fatty acids | | | |
| C18:1 ω9c | 1.33 | 0.13 | 3.85 |
